# Supplementary material for: The Vastus Lateralis Muscle Interstitium Proteome Changes after an Acute Nociception in Patients with Fibromyalgia Compared to Healthy Subjects—A Microdialysis Study
Source: MDPI journal article supplement (doi:10.3390/biomedicines11010206), 2023-01-13
Supplement: s1 [file s1]

**Table S1.** Measurement of physical capacity and functional tests of muscle strength, and pressure pain threshold (PPT) as a measure of pain sensitivity before (baseline) and after (post) 15 weeks of resistance exercise in fibromyalgia (FM) patients and healthy controls (CON). Data are presented as mean  $\pm$ 1 standard deviation (SD).

| Variables                                  | CON<br>Baseline<br><i>n</i> = 28      | FM<br>Baseline<br><i>n</i> = 26 | FM vs CON<br>Baseline<br>P-value | CON<br>Post Exercise<br><i>n</i> = 26 | FM<br>Post Exercise<br><i>n</i> = 25 | FM vs CON<br>Post Exercise<br>P-Value | FM<br>Baseline vs Post Exercise<br>P-value |
|--------------------------------------------|---------------------------------------|---------------------------------|----------------------------------|---------------------------------------|--------------------------------------|---------------------------------------|--------------------------------------------|
|                                            | <b>Physical capacity</b>              |                                 |                                  |                                       |                                      |                                       |                                            |
| 6-minute walking test (meter)              | 626.3 ( $\pm$ 59.6)                   | 566 ( $\pm$ 73.4)               | 0.001                            | 650 ( $\pm$ 52.7)                     | 571.4 ( $\pm$ 65.3)                  | <0.001                                | 0.192                                      |
| Knee extension right (Steve Strong), (kg)) | 378.5 ( $\pm$ 86.9)                   | 323.8 ( $\pm$ 85.5)             | 0.021                            | 394.5 ( $\pm$ 70.2)                   | 351.4 ( $\pm$ 105)                   | 0.89                                  | 0.101                                      |
| Knee extension left (Steve Strong), (kg))  | 351.5 ( $\pm$ 80.3)                   | 314.2 ( $\pm$ 96)               | 0.134                            | 360.3 ( $\pm$ 66.0)                   | 351.5 ( $\pm$ 90.7)                  | 0.693                                 | 0.029                                      |
| Handgrip fore Max Right (Grippit, (N))     | 262.5 ( $\pm$ 35.5)                   | 175.2 ( $\pm$ 69.9)             | <0.001                           | 277.3 ( $\pm$ 42.7)                   | 214.4 ( $\pm$ 61.7)                  | <0.001                                | 0.005                                      |
| Handgrip fore Max left (Grippit, (N))      | 239.5 ( $\pm$ 43.9)                   | 180.3 ( $\pm$ 65.9)             | <0.001                           | 256.2 ( $\pm$ 45.0)                   | 206.5 ( $\pm$ 61.4)                  | 0.002                                 | 0.037                                      |
| Elbow flexion right (Isobex, (kg))         | 17.2 ( $\pm$ 4.4)                     | 12.2 ( $\pm$ 4.2)               | <0.001                           | 17.6 ( $\pm$ 4.1)                     | 14.9 ( $\pm$ 4.8)                    | 0.035                                 | 0.001                                      |
| Elbow flexion Left (Isobex (kg))           | 16.7 ( $\pm$ 4.0)                     | 12.4 ( $\pm$ 4.5)               | <0.001                           | 17.1 ( $\pm$ 2.8)                     | 14.5 ( $\pm$ 4.9)                    | 0.024                                 | 0.012                                      |
|                                            |                                       |                                 |                                  |                                       |                                      |                                       |                                            |
| Location measured PPT                      | <b>Pressure pain thresholds (PPT)</b> |                                 |                                  |                                       |                                      |                                       |                                            |
| Supraspinatus right                        | 327.8 ( $\pm$ 119.3)                  | 190.4 ( $\pm$ 97.9)             | <0.001                           | 299.7 ( $\pm$ 102.4)                  | 214.5 ( $\pm$ 86.1)                  | <0.001                                | 0.166                                      |
| Supraspinatus left                         | 310.0 ( $\pm$ 112)                    | 201.2 ( $\pm$ 95.6)             | <0.001                           | 314.1 ( $\pm$ 86.5)                   | 196.2 ( $\pm$ 110.7)                 | <0.001                                | 0.764                                      |
| Vastus lateralis right                     | 246.3 ( $\pm$ 105.2)                  | 136.3 ( $\pm$ 72.4)             | <0.001                           | 267.3 ( $\pm$ 112.4)                  | 156.9 ( $\pm$ 84.5)                  | <0.001                                | 0.270                                      |
| Vastus lateralis left                      | 272.1 ( $\pm$ 104.4)                  | 147.5 ( $\pm$ 100.3)            | <0.001                           | 255.4 ( $\pm$ 106.4)                  | 151.3 ( $\pm$ 86.9)                  | <0.001                                | 0.778                                      |
| Gluteus right                              | 369.1 ( $\pm$ 133.9)                  | 199.3 ( $\pm$ 125.1)            | <0.001                           | 601.0 ( $\pm$ 1131)                   | 211.2 ( $\pm$ 132)                   | <0.001                                | 0.778                                      |
| Gluteus left                               | 397.0 ( $\pm$ 113.5)                  | 203.9 ( $\pm$ 106.9)            | <0.001                           | 404.9 ( $\pm$ 182.3)                  | 245.6 ( $\pm$ 166.7)                 | <0.001                                | 0.271                                      |
| Knee right                                 | 363.6 ( $\pm$ 163.3)                  | 168.8 ( $\pm$ 84.7)             | <0.001                           | 346.8 ( $\pm$ 167.0)                  | 180.5 ( $\pm$ 116.3)                 | <0.001                                | 0.677                                      |
| Knee left                                  | 349.4 ( $\pm$ 158.5)                  | 167.0 ( $\pm$ 88.4)             | <0.001                           | 340.7 ( $\pm$ 149.7)                  | 184.0 ( $\pm$ 116.3)                 | <0.001                                | 0.382                                      |
| Mean PPT right side                        | 326.7 ( $\pm$ 106.8)                  | 173.7 ( $\pm$ 80.2)             | <0.001                           | 378.7 ( $\pm$ 318.9)                  | 190.8 ( $\pm$ 92.7)                  | 0.007                                 | 0.412                                      |
| Mean PPT left side                         | 332.1 ( $\pm$ 95.7)                   | 178.6 ( $\pm$ 95.7)             | <0.001                           | 328.7 ( $\pm$ 111.5)                  | 194.3 ( $\pm$ 96.9)                  | <0.001                                | 0.581                                      |

**Table S2.** Identified biological processes from STRING analysis tool (version 11.0). Bold marked biological processes are visualized in the protein-protein network in Figure 3.

| #Term ID          | Term Description                             | Observed Gene Count | Back-ground Gene Count | FDR                                     | Matching Proteins in Your Network (Labels)                                                        |
|-------------------|----------------------------------------------|---------------------|------------------------|-----------------------------------------|---------------------------------------------------------------------------------------------------|
| GO:0003012        | muscle system process                        | 9                   | 291                    | $6.09 \times 10^{-8}$                   | ACTA1,GSN,MYH7,MYOM1,MYOT,NEB,<br>SMPX,TPM2,TTN                                                   |
| GO:0002576        | platelet degranulation                       | 7                   | 129                    | $1.45 \times 10^{-7}$                   | APOA1,FGA,FGB,KNG1,ORM2,PLG,TTN                                                                   |
| <b>GO:0006936</b> | <b>muscle contraction</b>                    | <b>8</b>            | <b>244</b>             | <b><math>1.91 \times 10^{-7}</math></b> | <b>ACTA1,MYH7,MYOM1,MYOT,<br/>NEB,SMPX,TPM2,TTN</b>                                               |
| GO:0030049        | muscle filament sliding                      | 5                   | 38                     | $5.72 \times 10^{-7}$                   | ACTA1,MYH7,NEB,TPM2,TTN                                                                           |
| GO:0003008        | system process                               | 14                  | 1827                   | $7.31 \times 10^{-7}$                   | ACTA1,FGA,FGB,GSN,KNG1,MYH7,MYOM1,<br>MYOT,NEB,RBP4,SMPX,SYNPO,TPM2,TTN                           |
| GO:0072376        | protein activation cascade                   | 5                   | 74                     | $7.43 \times 10^{-5}$                   | C3,C4A,FGA,FGB,KNG1                                                                               |
| GO:0045055        | regulated exocytosis                         | 9                   | 691                    | $1.19 \times 10^{-5}$                   | APOA1,C3,FGA,FGB,GSN,KNG1,ORM2,<br>PLG,TTN                                                        |
| GO:0030029        | actin filament-based process                 | 8                   | 493                    | $1.23 \times 10^{-5}$                   | ACTA1,GSN,MYH7,MYOM1,MYOZ1,NEB,<br>TPM2,TTN                                                       |
| GO:0050714        | positive regulation of protein secretion     | 6                   | 240                    | $4.38 \times 10^{-5}$                   | FGA,FGB,MYOM1,ORM2,RBP4,TTN                                                                       |
| GO:0030195        | negative regulation of blood coagulation     | 4                   | 48                     | $4.46 \times 10^{-5}$                   | FGA,FGB,KNG1,PLG                                                                                  |
| GO:0050708        | regulation of protein secretion              | 7                   | 422                    | $4.91 \times 10^{-5}$                   | APOA1,FGA,FGB,MYOM1,ORM2,RBP4,TTN                                                                 |
| GO:0030239        | myofibril assembly                           | 4                   | 59                     | $6.81 \times 10^{-5}$                   | ACTA1,MYOM1,MYOZ1,TTN                                                                             |
| GO:0032879        | regulation of localization                   | 13                  | 2524                   | 0.00010                                 | APOA1,APOA4,C3,C4A,FGA,FGB,GSN,MYOM1,<br>ORM2,PLG,RBP4,SYNPO2,TTN                                 |
| GO:0048518        | positive regulation of biological process    | 18                  | 5459                   | 0.00013                                 | ACTA1,APOA1,APOA4,C3,C4A,FGA,FGB,<br>GSN,KNG1,MYOM1,NACA,ORM2,PLG,RBP4,<br>SYNPO,SYNPO2,TTN,UBA52 |
| GO:0009611        | response to wounding                         | 7                   | 547                    | 0.00015                                 | APOA1,FGA,FGB,GSN,KNG1,NACA,PLG                                                                   |
| GO:0034114        | regulation of heterotypic cell-cell adhesion | 3                   | 21                     | 0.00015                                 | APOA1,FGA,FGB                                                                                     |

|            |                                                                    |    |      |         |                                                                                               |
|------------|--------------------------------------------------------------------|----|------|---------|-----------------------------------------------------------------------------------------------|
| GO:0042730 | fibrinolysis                                                       | 3  | 21   | 0.00015 | FGA,FGB,PLG                                                                                   |
| GO:0048522 | positive regulation of cellular process                            | 17 | 4898 | 0.00015 | APOA1,APOA4,C3,C4A,FGA,FGB,GSN, KNG1,MYOM1,NACA,ORM2,PLG,RBP4, SYNPO,SYNPO2,TTN,UBA52         |
| GO:0007015 | actin filament organization                                        | 5  | 200  | 0.00018 | ACTA1,GSN,MYOM1,TPM2,TTN                                                                      |
| GO:0032501 | multicellular organismal process                                   | 19 | 6507 | 0.00020 | ACTA1,APOA1,APOA4,C3,FGA,FGB, GSN,KNG1,MYH7,MYOM1,MYOT, NACA,NEB,PLG,RBP4,SMPX,SYNPO,TPM2,TTN |
| GO:0014888 | striated muscle adaptation                                         | 3  | 26   | 0.00021 | ACTA1,GSN,MYH7                                                                                |
| GO:0022607 | cellular component assembly                                        | 12 | 2343 | 0.00021 | ACTA1,APOA1,APOA4,FGA,FGB,GSN, MYOM1,MYOZ1,SYNPO,SYNPO2,TTN,UBA52                             |
| GO:0072378 | blood coagulation, fibrin clot formation                           | 3  | 27   | 0.00021 | FGA,FGB,KNG1                                                                                  |
| GO:0097435 | supramolecular fiber organization                                  | 6  | 383  | 0.00021 | ACTA1,GSN,MYOM1,MYOZ1,TPM2,TTN                                                                |
| GO:0051050 | positive regulation of transport                                   | 8  | 892  | 0.00022 | C3,C4A,FGA,FGB,MYOM1,ORM2,RBP4,TTN                                                            |
| GO:0032880 | regulation of protein localization                                 | 8  | 901  | 0.00023 | APOA1,FGA,FGB,GSN,MYOM1, ORM2,RBP4,TTN                                                        |
| GO:0030036 | actin cytoskeleton organization                                    | 6  | 418  | 0.00027 | ACTA1,GSN,MYOM1,MYOZ1,TPM2,TTN                                                                |
| GO:1900026 | positive regulation of substrate adhesion-dependent cell spreading | 3  | 32   | 0.00027 | APOA1,FGA,FGB                                                                                 |
| GO:0006941 | striated muscle contraction                                        | 4  | 111  | 0.00029 | MYH7,MYOM1,SMPX,TTN                                                                           |
| GO:0070925 | organelle assembly                                                 | 7  | 666  | 0.00029 | ACTA1,GSN,MYOM1,MYOZ1,SYNPO,SYNPO2,TTN                                                        |
| GO:0006959 | humoral immune response                                            | 5  | 252  | 0.00030 | C3,C4A,FGA,FGB,KNG1                                                                           |
| GO:0032101 | regulation of response to external stimulus                        | 8  | 955  | 0.00030 | APOA1,C3,C4A,FGA,FGB,KNG1,PLG,UBA52                                                           |
| GO:0090207 | regulation of triglyceride metabolic process                       | 3  | 34   | 0.00030 | APOA1,APOA4,C3                                                                                |
| GO:0016192 | vesicle-mediated transport                                         | 10 | 1699 | 0.00035 | APOA1,C3,FGA,FGB,GSN,KNG1,ORM2, PLG,TTN,UBA52                                                 |
| GO:0061061 | muscle structure development                                       | 6  | 457  | 0.00035 | ACTA1,MYH7,MYOM1,MYOZ1,NEB,TTN                                                                |
| GO:0042060 | wound healing                                                      | 6  | 461  | 0.00036 | FGA,FGB,GSN,KNG1,NACA,PLG                                                                     |

|                   |                                                        |           |             |                |                                                                                  |
|-------------------|--------------------------------------------------------|-----------|-------------|----------------|----------------------------------------------------------------------------------|
| GO:0014706        | striated muscle tissue development                     | 5         | 271         | 0.00038        | ACTA1,MYH7,MYOM1,RBP4,TTN                                                        |
| GO:0051049        | regulation of transport                                | 10        | 1732        | 0.00038        | APOA1,APOA4,C3,C4A,FGA,FGB,MYOM1,ORM2,RBP4,TTN                                   |
| GO:0002682        | regulation of immune system process                    | 9         | 1391        | 0.00046        | APOA1,C3,C4A,FGA,FGB,GSN,ORM2,RBP4,UBA52                                         |
| GO:0007517        | muscle organ development                               | 5         | 287         | 0.00046        | ACTA1,MYH7,MYOM1,NEB,TTN                                                         |
| GO:0010035        | response to inorganic substance                        | 6         | 491         | 0.00046        | ACTA1,APOA4,FGA,FGB,GSN,TTN                                                      |
| GO:0032956        | regulation of actin cytoskeleton organization          | 5         | 297         | 0.00053        | APOA1,GSN,NEB,SYNPO,SYNPO2                                                       |
| <b>GO:0006950</b> | <b>response to stress</b>                              | <b>13</b> | <b>3267</b> | <b>0.00057</b> | <b>APOA1,APOA4,C3,C4A,FGA,FGB,GSN,KNNG1,MYH7,NACA,ORM2,PLG,UBA52</b>             |
| GO:0032102        | negative regulation of response to external stimulus   | 5         | 310         | 0.00061        | APOA1,FGA,FGB,KNNG1,PLG                                                          |
| GO:0031099        | regeneration                                           | 4         | 151         | 0.00062        | APOA1,APOA4,GSN,NACA                                                             |
| GO:0030240        | skeletal muscle thin filament assembly                 | 2         | 6           | 0.00069        | ACTA1,TTN                                                                        |
| GO:0043152        | induction of bacterial agglutination                   | 2         | 6           | 0.00069        | FGA,FGB                                                                          |
| GO:0051130        | positive regulation of cellular component organization | 8         | 1128        | 0.00069        | APOA1,C3,C4A,FGA,FGB,GSN,SYNPO,SYNPO2                                            |
| GO:0016043        | cellular component organization                        | 16        | 5163        | 0.00071        | ACTA1,APOA1,APOA4,C3,FGA,FGB,GSN,MYOM1,MYOZ1,NEB,PLG,SYNPO,SYNPO2,TPM2,TTN,UBA52 |
| GO:2000257        | regulation of protein activation cascade               | 3         | 54          | 0.00075        | C3,C4A,FGA                                                                       |
| GO:0010038        | response to metal ion                                  | 5         | 339         | 0.00084        | ACTA1,FGA,FGB,GSN,TTN                                                            |
| GO:0030300        | regulation of intestinal cholesterol absorption        | 2         | 7           | 0.00084        | APOA1,APOA4                                                                      |
| GO:0043062        | extracellular structure organization                   | 5         | 339         | 0.00084        | APOA1,APOA4,FGA,FGB,PLG                                                          |
| GO:2000427        | positive regulation of apoptotic cell clearance        | 2         | 7           | 0.00084        | C3,C4A                                                                           |

|            |                                                          |    |      |         |                                                                |
|------------|----------------------------------------------------------|----|------|---------|----------------------------------------------------------------|
| GO:0032233 | positive regulation of actin filament bundle assembly    | 3  | 60   | 0.00093 | APOA1,SYNPO,SYNPO2                                             |
| GO:0010898 | positive regulation of triglyceride catabolic process    | 2  | 8    | 0.00097 | APOA1,APOA4                                                    |
| GO:0034371 | chylomicron remodeling                                   | 2  | 8    | 0.00097 | APOA1,APOA4                                                    |
| GO:1902905 | positive regulation of supramolecular fiber organization | 4  | 180  | 0.00099 | APOA1,GSN,SYNPO,SYNPO2                                         |
| GO:0006952 | defense response                                         | 8  | 1234 | 0.0010  | APOA4,C3,C4A,FGA,FGB,GSN,KNNG1,ORM2                            |
| GO:0043687 | post-translational protein modification                  | 5  | 365  | 0.0010  | APOA1,C3,C4A,FGA,KNNG1                                         |
| GO:0008015 | blood circulation                                        | 5  | 373  | 0.0011  | FGA,FGB,KNNG1,MYH7,TTN                                         |
| GO:0010810 | regulation of cell-substrate adhesion                    | 4  | 189  | 0.0011  | APOA1,FGA,FGB,PLG                                              |
| GO:0010873 | positive regulation of cholesterol esterification        | 2  | 9    | 0.0011  | APOA1,APOA4                                                    |
| GO:0030155 | regulation of cell adhesion                              | 6  | 623  | 0.0011  | APOA1,FGA,FGB,GSN,KNNG1,PLG                                    |
| GO:0051006 | positive regulation of lipoprotein lipase activity       | 2  | 9    | 0.0011  | APOA1,APOA4                                                    |
| GO:0065008 | regulation of biological quality                         | 13 | 3559 | 0.0011  | APOA1,APOA4,C3,FGA,FGB,GSN,KNNG1,MYH7,NEB,PLG,RBP4,SYNPO,UBA52 |
| GO:0034378 | chylomicron assembly                                     | 2  | 10   | 0.0012  | APOA1,APOA4                                                    |
| GO:0002253 | activation of immune response                            | 5  | 393  | 0.0013  | C3,C4A,FGA,FGB,UBA52                                           |
| GO:0051495 | positive regulation of cytoskeleton organization         | 4  | 203  | 0.0013  | APOA1,GSN,SYNPO,SYNPO2                                         |
| GO:0080134 | regulation of response to stress                         | 8  | 1299 | 0.0013  | APOA1,C3,C4A,FGA,FGB,KNNG1,PLG,UBA52                           |
| GO:0009605 | response to external stimulus                            | 10 | 2152 | 0.0014  | ACTA1,APOA1,APOA4,C3,C4A,FGA,FGB,GSN,KNNG1,TTN                 |
| GO:0010737 | protein kinase A signaling                               | 2  | 11   | 0.0014  | MYOM1,TTN                                                      |
| GO:0031639 | plasminogen activation                                   | 2  | 11   | 0.0014  | FGA,FGB                                                        |
| GO:0033700 | phospholipid efflux                                      | 2  | 12   | 0.0015  | APOA1,APOA4                                                    |

|            |                                                         |    |      |        |                                                         |
|------------|---------------------------------------------------------|----|------|--------|---------------------------------------------------------|
| GO:1904035 | regulation of epithelial cell apoptotic process         | 3  | 78   | 0.0015 | FGA,FGB,GSN                                             |
| GO:0031347 | regulation of defense response                          | 6  | 676  | 0.0016 | APOA1,C3,C4A,FGA,FGB,UBA52                              |
| GO:0045087 | innate immune response                                  | 6  | 676  | 0.0016 | APOA4,C3,C4A,FGA,FGB,GSN                                |
| GO:0034116 | positive regulation of heterotypic cell-cell adhesion   | 2  | 13   | 0.0017 | FGA,FGB                                                 |
| GO:0034380 | high-density lipoprotein particle assembly              | 2  | 13   | 0.0017 | APOA1,APOA4                                             |
| GO:0051258 | protein polymerization                                  | 3  | 83   | 0.0017 | FGA,FGB,GSN                                             |
| GO:0071688 | striated muscle myosin thick filament assembly          | 2  | 13   | 0.0017 | MYOM1,TTN                                               |
| GO:0050790 | regulation of catalytic activity                        | 10 | 2249 | 0.0018 | APOA1,APOA4,C3,C4A,GSN,KNK1,<br>SYNPO2,TPM2,TTN,UBA52   |
| GO:0001523 | retinoid metabolic process                              | 3  | 87   | 0.0019 | APOA1,APOA4,RBP4                                        |
| GO:0002224 | toll-like receptor signaling pathway                    | 3  | 87   | 0.0019 | FGA,FGB,UBA52                                           |
| GO:0110053 | regulation of actin filament organization               | 4  | 235  | 0.0020 | APOA1,GSN,SYNPO,SYNPO2                                  |
| GO:0051239 | regulation of multicellular organismal process          | 11 | 2788 | 0.0021 | APOA1,APOA4,C3,FGA,FGB,KNK1,<br>MYH7,NACA,ORM2,PLG,RBP4 |
| GO:0045723 | positive regulation of fatty acid biosynthetic process  | 2  | 16   | 0.0022 | APOA1,APOA4                                             |
| GO:0051128 | regulation of cellular component organization           | 10 | 2306 | 0.0022 | APOA1,APOA4,C3,C4A,FGA,FGB,<br>GSN,NEB,SYNPO,SYNPO2     |
| GO:0090066 | regulation of anatomical structure size                 | 5  | 464  | 0.0022 | FGA,FGB,GSN,KNK1,NEB                                    |
| GO:0090277 | positive regulation of peptide hormone secretion        | 3  | 95   | 0.0022 | FGA,FGB,RBP4                                            |
| GO:0034375 | high-density lipoprotein particle remodeling            | 2  | 17   | 0.0024 | APOA1,APOA4                                             |
| GO:0043691 | reverse cholesterol transport                           | 2  | 17   | 0.0024 | APOA1,APOA4                                             |
| GO:0051241 | negative regulation of multicellular organismal process | 7  | 1098 | 0.0025 | APOA1,APOA4,FGA,FGB,KNK1,PLG,RBP4                       |
| GO:0032103 | positive regulation of response to                      | 5  | 499  | 0.0029 | C3,FGA,FGB,PLG,UBA52                                    |

|                   |                                                  |           |             |               |                                                                                                 |
|-------------------|--------------------------------------------------|-----------|-------------|---------------|-------------------------------------------------------------------------------------------------|
| external stimulus |                                                  |           |             |               |                                                                                                 |
| GO:0065003        | protein-containing complex assembly              | 8         | 1514        | 0.0029        | APOA1,APOA4,FGA,FGB,GSN,MYOM1,TTN,UBA52                                                         |
| GO:0002250        | adaptive immune response                         | 4         | 280         | 0.0033        | C3,C4A,FGA,FGB                                                                                  |
| GO:0044057        | regulation of system process                     | 5         | 516         | 0.0033        | APOA1,APOA4,FGA,FGB,MYH7                                                                        |
| GO:0006810        | transport                                        | 13        | 4130        | 0.0034        | APOA1,APOA4,C3,FGA,FGB,GSN,KNNG1,NACA,ORM2,PLG,RBP4,TTN,UBA52                                   |
| <b>GO:0006955</b> | <b>immune response</b>                           | <b>8</b>  | <b>1560</b> | <b>0.0034</b> | <b>APOA4,C3,C4A,FGA,FGB,GSN,KNNG1,ORM2</b>                                                      |
| GO:0007596        | blood coagulation                                | 4         | 288         | 0.0035        | FGA,FGB,KNNG1,PLG                                                                               |
| GO:0032268        | regulation of cellular protein metabolic process | 10        | 2486        | 0.0035        | APOA1,C3,C4A,FGA,FGB,GSN,KNNG1,SYNPO2,TTN,UBA52                                                 |
| GO:0051707        | response to other organism                       | 7         | 1173        | 0.0035        | APOA4,C3,C4A,FGA,FGB,GSN,KNNG1                                                                  |
| GO:0070613        | regulation of protein processing                 | 3         | 116         | 0.0035        | C3,C4A,GSN                                                                                      |
| GO:0034622        | cellular protein-containing complex assembly     | 6         | 832         | 0.0036        | FGA,FGB,GSN,MYOM1,TTN,UBA52                                                                     |
| GO:0033344        | cholesterol efflux                               | 2         | 24          | 0.0038        | APOA1,APOA4                                                                                     |
| GO:0010954        | positive regulation of protein processing        | 2         | 25          | 0.0040        | C3,GSN                                                                                          |
| GO:0070527        | platelet aggregation                             | 2         | 25          | 0.0040        | FGA,FGB                                                                                         |
| GO:0031102        | neuron projection regeneration                   | 2         | 26          | 0.0042        | APOA1,APOA4                                                                                     |
| GO:0035296        | regulation of tube diameter                      | 3         | 129         | 0.0042        | FGA,FGB,KNNG1                                                                                   |
| GO:0050776        | regulation of immune response                    | 6         | 873         | 0.0042        | APOA1,C3,C4A,FGA,FGB,UBA52                                                                      |
| <b>GO:0050896</b> | <b>response to stimulus</b>                      | <b>18</b> | <b>7824</b> | <b>0.0042</b> | <b>ACTA1,APOA1,APOA4,C3,C4A,FGA,FGB,GSN,KNNG1,MYH7,MYOM1,NACA,ORM2,PLG,RBP4,SYNPO,TTN,UBA52</b> |
| GO:0051336        | regulation of hydrolase activity                 | 7         | 1238        | 0.0042        | APOA1,APOA4,C3,C4A,GSN,KNNG1,TPM2                                                               |
| GO:0051592        | response to calcium ion                          | 3         | 129         | 0.0042        | FGA,FGB,TTN                                                                                     |
| GO:1905952        | regulation of lipid localization                 | 3         | 129         | 0.0042        | APOA1,APOA4,C3                                                                                  |
| GO:0002684        | positive regulation of immune system process     | 6         | 882         | 0.0043        | C3,C4A,FGA,FGB,RBP4,UBA52                                                                       |
| GO:0003300        | cardiac muscle hypertrophy                       | 2         | 28          | 0.0044        | MYH7,TTN                                                                                        |
| GO:0015850        | organic hydroxy compound transport               | 3         | 134         | 0.0044        | APOA1,APOA4,RBP4                                                                                |

|            |                                                                                         |    |      |        |                                                       |
|------------|-----------------------------------------------------------------------------------------|----|------|--------|-------------------------------------------------------|
| GO:2000352 | negative regulation of endothelial cell apoptotic process                               | 2  | 28   | 0.0044 | FGA,FGB                                               |
| GO:0097746 | regulation of blood vessel diameter                                                     | 3  | 137  | 0.0046 | FGA,FGB,KNNG1                                         |
| GO:0006911 | phagocytosis, engulfment                                                                | 2  | 31   | 0.0051 | C3,GSN                                                |
| GO:0019730 | antimicrobial humoral response                                                          | 3  | 143  | 0.0051 | FGA,FGB,KNNG1                                         |
| GO:0045907 | positive regulation of vasoconstriction                                                 | 2  | 33   | 0.0057 | FGA,FGB                                               |
| GO:0070328 | triglyceride homeostasis                                                                | 2  | 33   | 0.0057 | APOA1,APOA4                                           |
| GO:0009893 | positive regulation of metabolic process                                                | 11 | 3280 | 0.0058 | ACTA1,APOA1,APOA4,C3,FGA,FGB,GSN,MYOM1,NACA,TTN,UBA52 |
| GO:0006958 | complement activation, classical pathway                                                | 2  | 34   | 0.0059 | C3,C4A                                                |
| GO:0048738 | cardiac muscle tissue development                                                       | 3  | 154  | 0.0059 | MYH7,RBP4,TTN                                         |
| GO:0002697 | regulation of immune effector process                                                   | 4  | 362  | 0.0061 | APOA1,C3,C4A,RBP4                                     |
| GO:0061384 | heart trabecula morphogenesis                                                           | 2  | 35   | 0.0061 | NACA,RBP4                                             |
| GO:0001932 | regulation of protein phosphorylation                                                   | 7  | 1370 | 0.0063 | APOA1,C3,FGA,FGB,SYNPO2,TTN,UBA52                     |
| GO:0022407 | regulation of cell-cell adhesion                                                        | 4  | 366  | 0.0063 | APOA1,FGA,FGB,PLG                                     |
| GO:0031349 | positive regulation of defense response                                                 | 4  | 365  | 0.0063 | C3,FGA,FGB,UBA52                                      |
| GO:1902042 | negative regulation of extrinsic apoptotic signaling pathway via death domain receptors | 2  | 36   | 0.0063 | FGA,FGB                                               |
| GO:0050706 | regulation of interleukin-1 beta secretion                                              | 2  | 37   | 0.0066 | APOA1,ORM2                                            |
| GO:0045214 | sarcomere organization                                                                  | 2  | 38   | 0.0068 | MYOM1,TTN                                             |
| GO:0051180 | vitamin transport                                                                       | 2  | 38   | 0.0068 | APOA1,RBP4                                            |
| GO:0003205 | cardiac chamber development                                                             | 3  | 166  | 0.0069 | MYH7,NACA,RBP4                                        |
| GO:0002758 | innate immune response-activating signal transduction                                   | 3  | 168  | 0.0070 | FGA,FGB,UBA52                                         |



|            |                                             |    |      |        |                                                        |
|------------|---------------------------------------------|----|------|--------|--------------------------------------------------------|
| GO:0006695 | cholesterol biosynthetic process            | 2  | 41   | 0.0076 | APOA1,APOA4                                            |
| GO:0046890 | regulation of lipid biosynthetic process    | 3  | 174  | 0.0076 | APOA1,APOA4,C3                                         |
| GO:0052548 | regulation of endopeptidase activity        | 4  | 393  | 0.0076 | C3,C4A,GSN,KNG1                                        |
| GO:0002376 | immune system process                       | 9  | 2370 | 0.0078 | APOA4,C3,C4A,FGA,FGB,GSN,KNG1,ORM2,UBA52               |
| GO:0048747 | muscle fiber development                    | 2  | 43   | 0.0080 | ACTA1,TTN                                              |
| GO:0048468 | cell development                            | 7  | 1493 | 0.0092 | ACTA1,APOA1,APOA4,GSN,MYOM1,MYOZ1,TTN                  |
| GO:0019538 | protein metabolic process                   | 12 | 4194 | 0.0102 | APOA1,APOA4,C3,C4A,FGA,FGB,GSN,KNG1,NACA,PLG,TTN,UBA52 |
| GO:0044267 | cellular protein metabolic process          | 11 | 3603 | 0.0104 | APOA1,APOA4,C3,C4A,FGA,GSN,KNG1,NACA,PLG,TTN,UBA52     |
| GO:0051346 | negative regulation of hydrolase activity   | 4  | 438  | 0.0104 | APOA1,C3,C4A,KNG1                                      |
| GO:0030449 | regulation of complement activation         | 2  | 52   | 0.0107 | C3,C4A                                                 |
| GO:0051704 | multi-organism process                      | 9  | 2514 | 0.0109 | APOA4,C3,C4A,FGA,FGB,GSN,KNG1,PLG,UBA52                |
| GO:0042246 | tissue regeneration                         | 2  | 54   | 0.0113 | GSN,NACA                                               |
| GO:0048584 | positive regulation of response to stimulus | 8  | 2054 | 0.0123 | APOA1,C3,C4A,FGA,FGB,GSN,PLG,UBA52                     |
| GO:0060627 | regulation of vesicle-mediated transport    | 4  | 480  | 0.0138 | C3,C4A,FGA,FGB                                         |
| GO:0006954 | inflammatory response                       | 4  | 482  | 0.0140 | C3,C4A,KNG1,ORM2                                       |
| GO:0009888 | tissue development                          | 7  | 1626 | 0.0140 | ACTA1,GSN,MYH7,MYOM1,NACA,RBP4,TTN                     |
| GO:0007507 | heart development                           | 4  | 485  | 0.0141 | MYH7,NACA,RBP4,TTN                                     |
| GO:0010647 | positive regulation of cell communication   | 7  | 1631 | 0.0141 | APOA1,C3,FGA,FGB,GSN,RBP4,UBA52                        |
| GO:0006508 | proteolysis                                 | 6  | 1203 | 0.0142 | C3,C4A,FGA,FGB,PLG,UBA52                               |
| GO:0023056 | positive regulation of signaling            | 7  | 1638 | 0.0142 | APOA1,C3,FGA,FGB,GSN,RBP4,UBA52                        |

|            |                                                          |    |       |        |                                                                                                          |
|------------|----------------------------------------------------------|----|-------|--------|----------------------------------------------------------------------------------------------------------|
| GO:0055008 | cardiac muscle tissue morphogenesis                      | 2  | 63    | 0.0144 | MYH7,TTN                                                                                                 |
| GO:0003007 | heart morphogenesis                                      | 3  | 235   | 0.0149 | MYH7,RBP4,TTN                                                                                            |
| GO:0044089 | positive regulation of cellular component biogenesis     | 4  | 498   | 0.0150 | APOA1,GSN,SYNPO,SYNPO2                                                                                   |
| GO:0048646 | anatomical structure formation involved in morphogenesis | 5  | 831   | 0.0150 | ACTA1,MYOM1,MYOZ1,RBP4,TTN                                                                               |
| GO:0010951 | negative regulation of endopeptidase activity            | 3  | 242   | 0.0158 | C3,C4A,KNG1                                                                                              |
| GO:0048523 | negative regulation of cellular process                  | 12 | 4454  | 0.0158 | APOA1,APOA4,C3,C4A,FGA,FGB,GSN,KNG1,NACA,PLG,RBP4,UBA52                                                  |
| GO:0007162 | negative regulation of cell adhesion                     | 3  | 245   | 0.0162 | APOA1,KNG1,PLG                                                                                           |
| GO:0010817 | regulation of hormone levels                             | 4  | 511   | 0.0162 | APOA1,FGA,FGB,RBP4                                                                                       |
| GO:0065007 | biological regulation                                    | 21 | 11740 | 0.0168 | ACTA1,APOA1,APOA4,C3,C4A,FGA,FGB,GSN,KNG1,MYH7,MYOM1,NACA,NEB,ORM2,PLG,RBP4,SYNPO, SYNPO2,TPM2,TTN,UBA52 |
| GO:1903522 | regulation of blood circulation                          | 3  | 249   | 0.0168 | FGA,FGB,MYH7                                                                                             |
| GO:0042632 | cholesterol homeostasis                                  | 2  | 71    | 0.0169 | APOA1,APOA4                                                                                              |
| GO:0046470 | phosphatidylcholine metabolic process                    | 2  | 72    | 0.0172 | APOA1,APOA4                                                                                              |
| GO:0060048 | cardiac muscle contraction                               | 2  | 73    | 0.0176 | MYH7,TTN                                                                                                 |
| GO:0045921 | positive regulation of exocytosis                        | 2  | 78    | 0.0192 | FGA,FGB                                                                                                  |
| GO:0051492 | regulation of stress fiber assembly                      | 2  | 78    | 0.0192 | APOA1,SYNPO                                                                                              |
| GO:1901564 | organonitrogen compound metabolic process                | 13 | 5281  | 0.0195 | APOA1,APOA4,C3,C4A,FGA,FGB,GSN,KNG1,MYH7,NACA,PLG,TTN,UBA52                                              |
| GO:0006869 | lipid transport                                          | 3  | 272   | 0.0197 | APOA1,APOA4,RBP4                                                                                         |
| GO:0006928 | movement of cell or subcellular component                | 6  | 1355  | 0.0221 | ACTA1,APOA1,MYH7,NEB,TPM2,TTN                                                                            |
| GO:0010628 | positive regulation of gene expression                   | 7  | 1826  | 0.0225 | ACTA1,C3,GSN,MYOM1,NACA,TTN,UBA52                                                                        |
| GO:0006066 | alcohol metabolic process                                | 3  | 290   | 0.0229 | APOA1,APOA4,RBP4                                                                                         |

|            |                                                         |    |       |        |                                                                                                      |
|------------|---------------------------------------------------------|----|-------|--------|------------------------------------------------------------------------------------------------------|
| GO:0022603 | regulation of anatomical structure morphogenesis        | 5  | 961   | 0.0240 | APOA1,C3,FGA,FGB,NACA                                                                                |
| GO:0030198 | extracellular matrix organization                       | 3  | 296   | 0.0240 | FGA,FGB,PLG                                                                                          |
| GO:0090130 | tissue migration                                        | 2  | 90    | 0.0240 | ACTA1,APOA1                                                                                          |
| GO:0002673 | regulation of acute inflammatory response               | 2  | 92    | 0.0248 | C3,C4A                                                                                               |
| GO:0050789 | regulation of biological process                        | 20 | 11116 | 0.0249 | ACTA1,APOA1,APOA4,C3,C4A,FGA,FGB, GSN,KNG1,MYH7,MYOM1,NACA,NEB, ORM2,PLG,RBP4,SYNPO,SYNPO2,TTN,UBA52 |
| GO:0002443 | leukocyte mediated immunity                             | 4  | 632   | 0.0291 | C3,C4A,GSN,ORM2                                                                                      |
| GO:0001775 | cell activation                                         | 5  | 1024  | 0.0303 | C3,FGA,FGB,GSN,ORM2                                                                                  |
| GO:0043900 | regulation of multi-organism process                    | 4  | 653   | 0.0321 | FGA,FGB,GSN,UBA52                                                                                    |
| GO:0048585 | negative regulation of response to stimulus             | 6  | 1483  | 0.0321 | APOA1,FGA,FGB,KNG1,PLG,UBA52                                                                         |
| GO:0009967 | positive regulation of signal transduction              | 6  | 1493  | 0.0329 | APOA1,C3,FGA,FGB,GSN,UBA52                                                                           |
| GO:0050727 | regulation of inflammatory response                     | 3  | 338   | 0.0329 | APOA1,C3,C4A                                                                                         |
| GO:0010604 | positive regulation of macromolecule metabolic process  | 9  | 3081  | 0.0330 | ACTA1,C3,FGA,FGB,GSN,MYOM1,NACA, TTN,UBA52                                                           |
| GO:0009653 | anatomical structure morphogenesis                      | 7  | 1992  | 0.0333 | ACTA1,MYH7,MYOM1,MYOZ1,NACA,RBP4,TTN                                                                 |
| GO:0042981 | regulation of apoptotic process                         | 6  | 1501  | 0.0333 | FGA,FGB,GSN,KNG1,NACA,UBA52                                                                          |
| GO:0042157 | lipoprotein metabolic process                           | 2  | 114   | 0.0349 | APOA1,APOA4                                                                                          |
| GO:0006996 | organelle organization                                  | 9  | 3131  | 0.0359 | ACTA1,GSN,MYOM1,MYOZ1,SYNPO, SYNPO2,TPM2,TTN,UBA52                                                   |
| GO:0007160 | cell-matrix adhesion                                    | 2  | 119   | 0.0376 | FGA,FGB                                                                                              |
| GO:0051240 | positive regulation of multicellular organismal process | 6  | 1551  | 0.0377 | C3,FGA,FGB,NACA,ORM2,PLG                                                                             |
| GO:0007519 | skeletal muscle tissue development                      | 2  | 122   | 0.0388 | ACTA1,MYOM1                                                                                          |
| GO:0002700 | regulation of production of molecular                   | 2  | 124   | 0.0397 | APOA1,RBP4                                                                                           |

|                             |                                                     |    |      |        |                                                                               |
|-----------------------------|-----------------------------------------------------|----|------|--------|-------------------------------------------------------------------------------|
| mediator of immune response |                                                     |    |      |        |                                                                               |
| GO:0019222                  | regulation of metabolic process                     | 14 | 6516 | 0.0397 | ACTA1,APOA1,APOA4,C3,C4A,FGA,<br>FGB,GSN,KNK1,MYOM1,NACA,SYNPO2,<br>TTN,UBA52 |
| GO:0071347                  | cellular response to interleukin-1                  | 2  | 124  | 0.0397 | FGB,UBA52                                                                     |
| GO:0003231                  | cardiac ventricle development                       | 2  | 125  | 0.0400 | MYH7,NACA                                                                     |
| GO:0016202                  | regulation of striated muscle tissue<br>development | 2  | 127  | 0.0408 | NACA,RBP4                                                                     |
| GO:0003206                  | cardiac chamber morphogenesis                       | 2  | 128  | 0.0410 | MYH7,RBP4                                                                     |
| GO:0045807                  | positive regulation of endocytosis                  | 2  | 129  | 0.0414 | C3,C4A                                                                        |
| GO:2001233                  | regulation of apoptotic signaling<br>pathway        | 3  | 388  | 0.0429 | FGA,FGB,GSN                                                                   |
| GO:0045471                  | response to ethanol                                 | 2  | 134  | 0.0437 | GSN,RBP4                                                                      |
| GO:0048583                  | regulation of response to stimulus                  | 10 | 3882 | 0.0437 | APOA1,C3,C4A,FGA,FGB,GSN,<br>KNK1,MYH7,PLG,UBA52                              |
| GO:0043902                  | positive regulation of multi-organ-<br>ism process  | 3  | 394  | 0.0440 | FGA,FGB,UBA52                                                                 |
